# Supplementary material
Source: publisher figshare collection journal article supplement (https://karger.figshare.com/ndownloader/files/8956075)

In figure 1c of the article by Amanzada et al. [2012;86:218–227] entitled ‘High predictability of a sustained virological response (87%) in chronic hepatitis C virus genotype 1 infection treatment by combined IL28B genotype analysis and  $\gamma$ -glutamyltransferase/alanine aminotransferase ratio: a retrospective single-center study’ an error occurred.

Different from what is stated in the Results section on page 222, left column, line 9, the text should read: ‘C homozygotes of IL28B with low pretreatment  $\gamma$ -GT/ALT ratio showed an OR of 5.5 (95% CI: 2.2–13.7,  $p = 0.0001$ ) compared to CT and TT genotypes with low  $\gamma$ -GT/ALT ratio. C homozygotes of IL28B with low pretreatment  $\gamma$ -GT/ALT ratio showed an OR of 26.6 (95% CI: 10–71.1,  $p < 0.0001$ ) compared to CT and TT genotypes with high ( $>0.70$ ) pretreatment  $\gamma$ -GT/ALT ratio (fig. 1c).’ Figure 1c should read as follows:

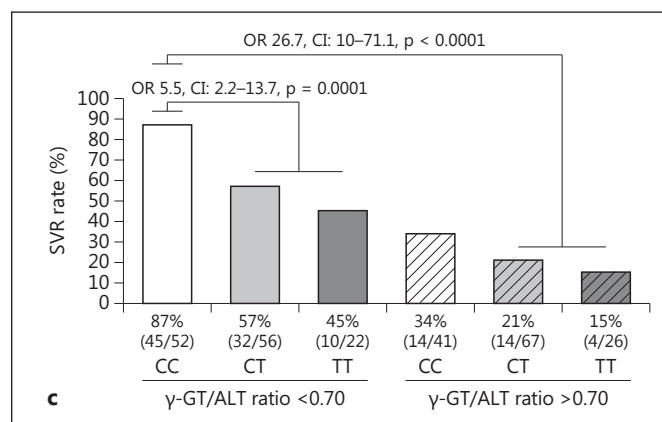

Supplement: Supplementary file 1 [file 8956075]
